# Supplementary material
Source: bioRxiv or medRxiv preprint supplement (https://medrxiv.org/highwire/filestream/83428/field_highwire_adjunct_files/3/2020.05.26.20113902-4.pdf)

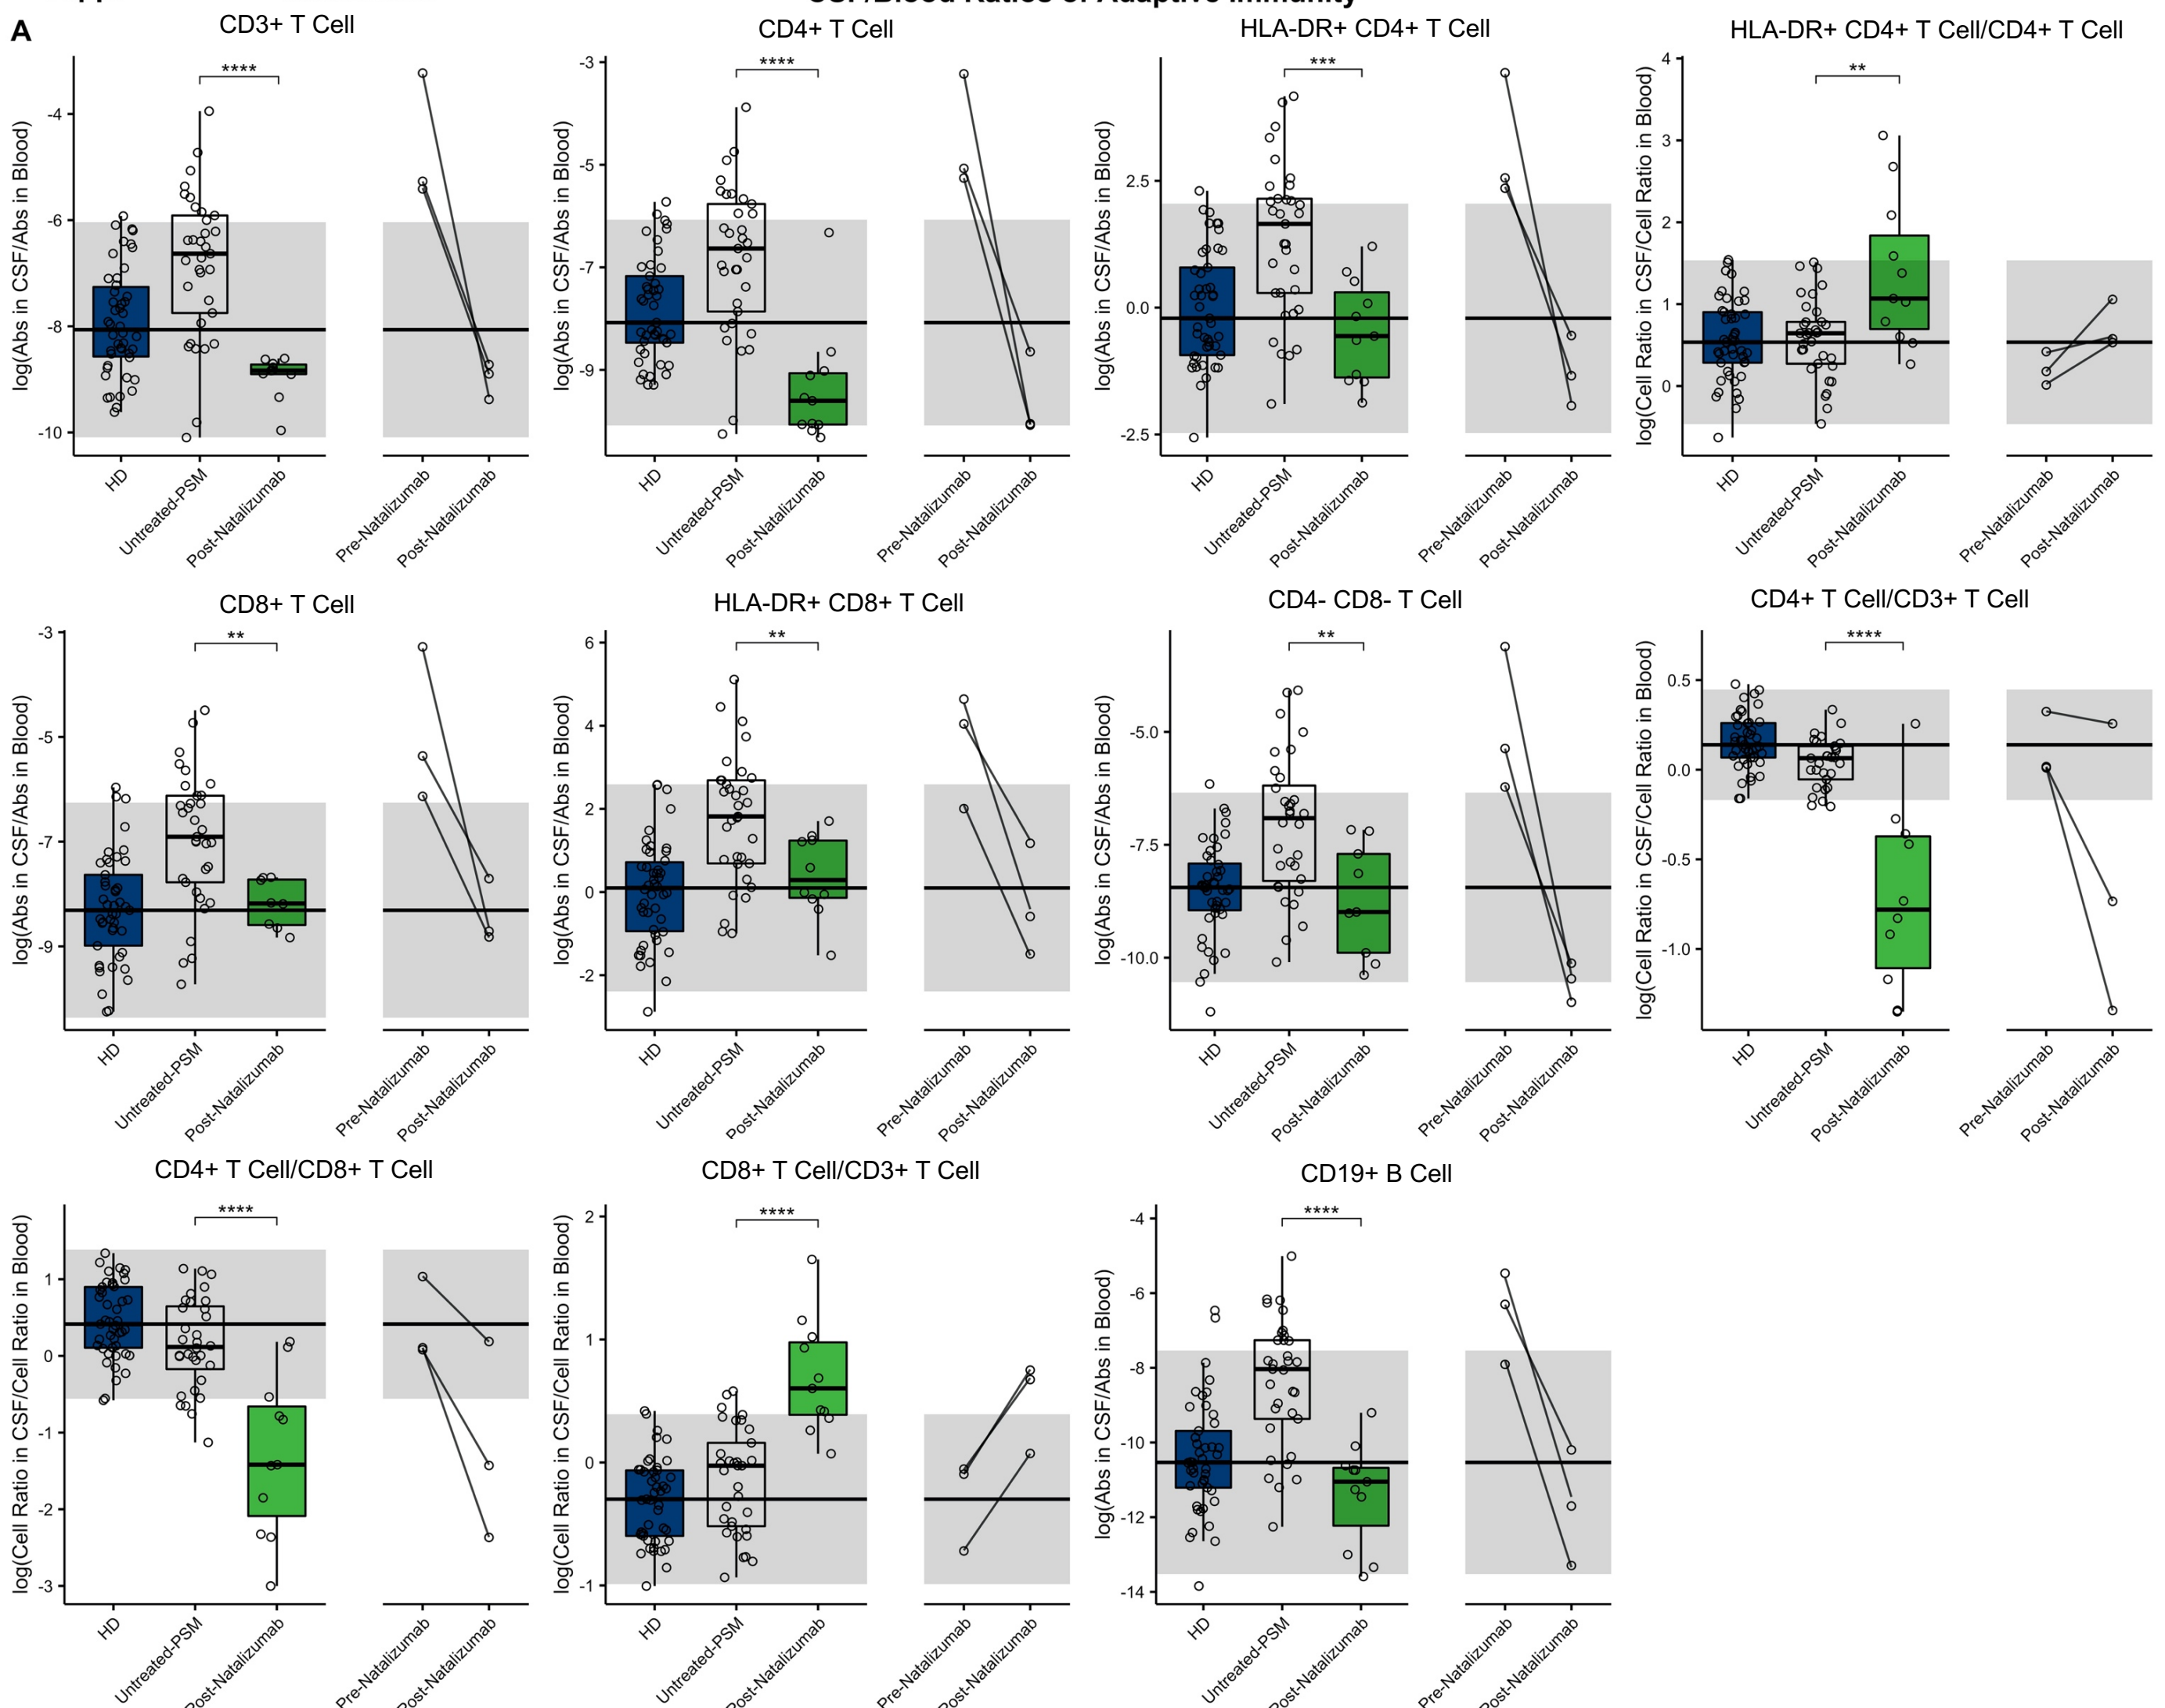

CSF/Blood Ratios of Innate Immunity

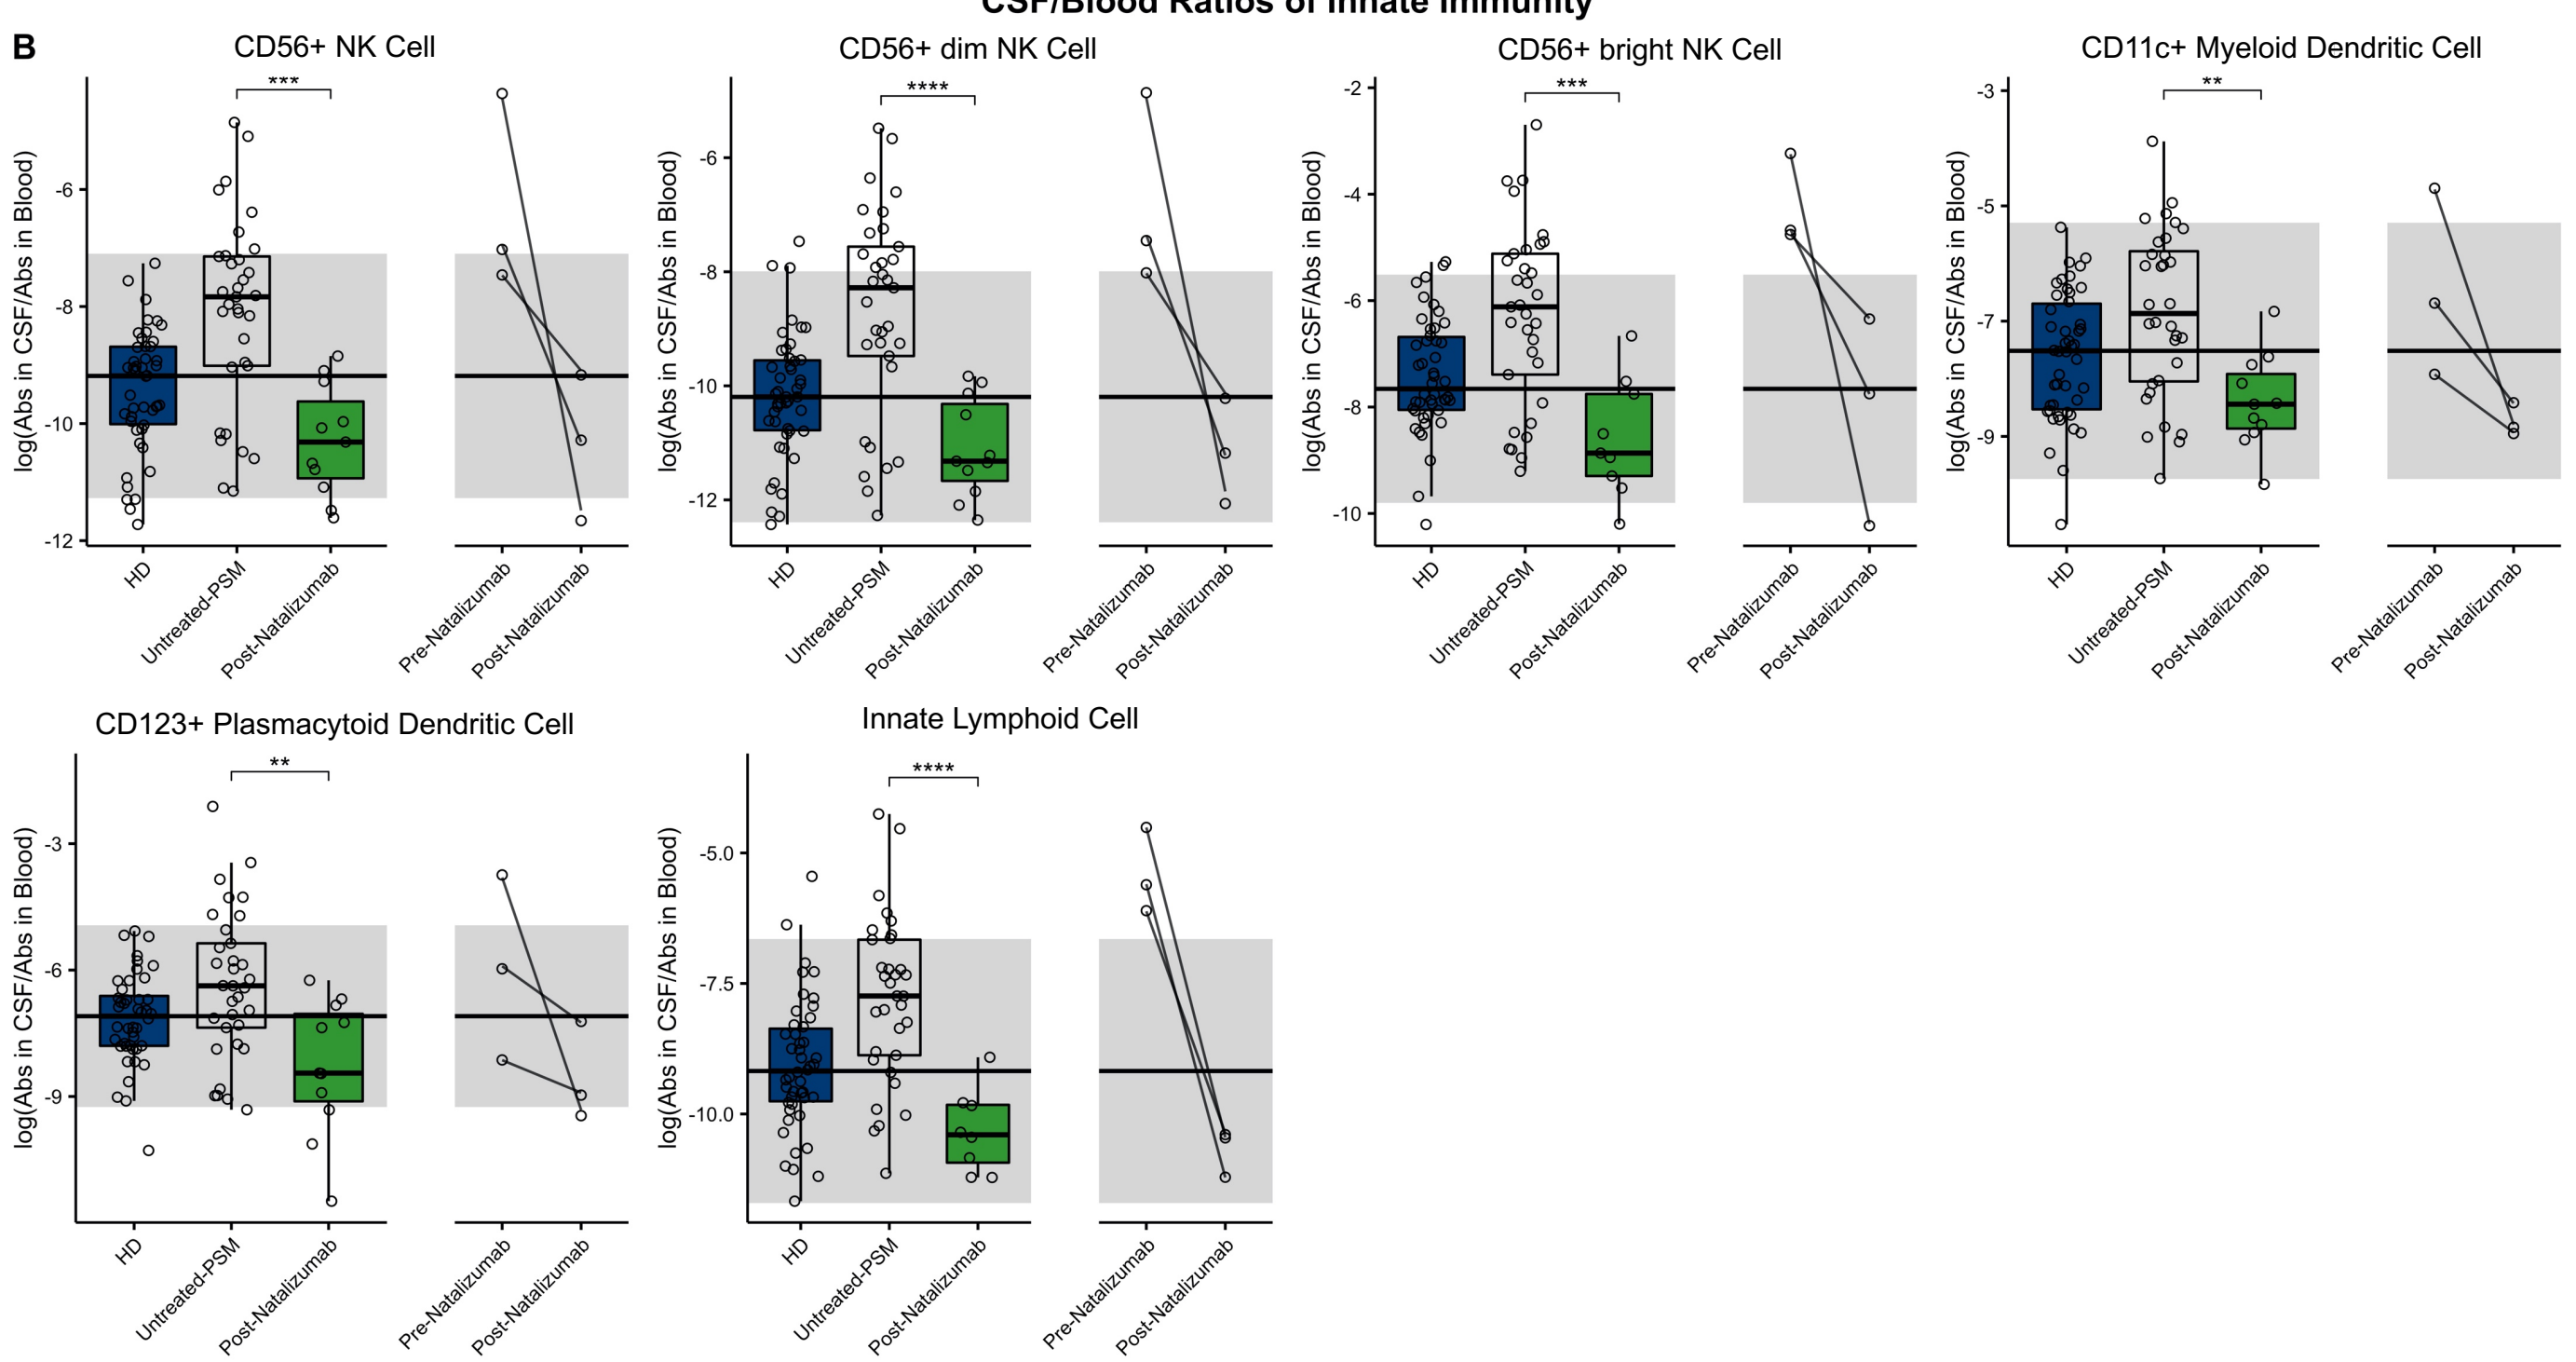

CSF/Blood Ratios of Other Immunity

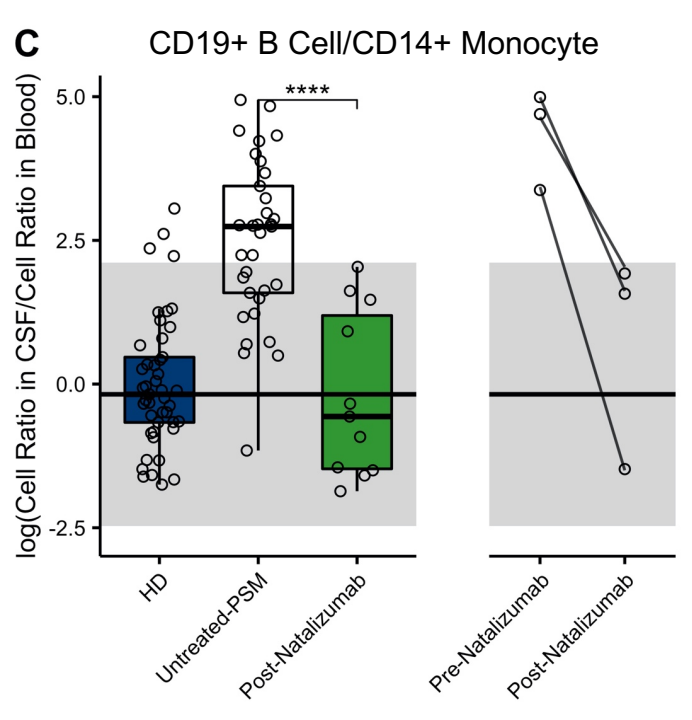

Supplement: Supplementary file [file 2020.05.26.20113902-4.pdf]
